# Supplementary material
Source: Springer Nature journal article supplement (https://www.springermedizin.de/resource/supplementary/13018_2009_118_MOESM2_ESM.pdf/9636354)

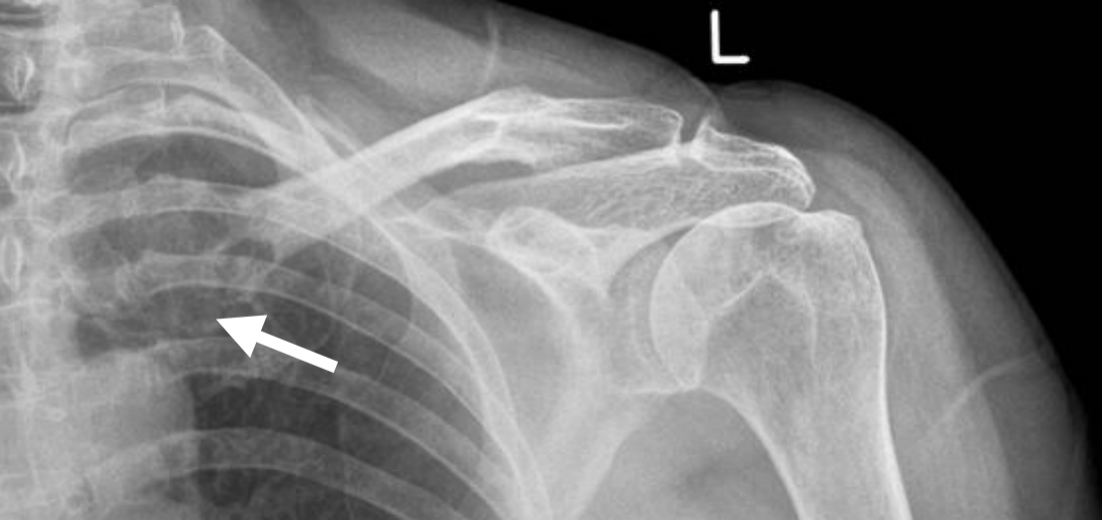

Supplement: MOESM2 [file 9636354]
